# Supplementary material
Source: PubMed Central journal article supplement (PMC3272095)
Supplement: NIHMS341655-supplement-supplement_1.pdf [file NIHMS341655-supplement-supplement_1.pdf]

Supplemental Table

|                                           | Clinical Categories of BMI |                  |                  |                  |                  | P value for equal association <sup>€</sup> |
|-------------------------------------------|----------------------------|------------------|------------------|------------------|------------------|--------------------------------------------|
|                                           | 1                          | 2                | 3                | 4                | 5                |                                            |
| <b>BMI Category</b>                       | <22 (n=7484)               | 22-23 (n=3466)   | 23-25 (n=7299)   | 25-29 (n=10 695) | ≥30 (n=5883)     |                                            |
| <b>Overall Event Type</b>                 |                            |                  |                  |                  |                  |                                            |
| <b>CVD (1094 cases)</b>                   | 184                        | 106              | 218              | 371              | 215              |                                            |
| Incidence rate (per 100 000 person-years) | 168                        | 209              | 204              | 239              | 253              |                                            |
| Age, energy, and randomization status     | 1.00                       | 1.24 (0.98-1.58) | 1.16 (0.95-1.41) | 1.35 (1.13-1.61) | 1.65 (1.36-2.01) | 0.006                                      |
| Basic model*                              | 1.00                       | 1.31 (1.03-1.67) | 1.22 (1.00-1.48) | 1.43 (1.20-1.71) | 1.72 (1.41-2.11) | 0.01                                       |
| <b>VTE (675 cases)</b>                    | 81                         | 50               | 127              | 242              | 175              |                                            |
| Incidence rate (per 100 000 person-years) | 74                         | 98               | 119              | 156              | 206              |                                            |
| Age, energy, and randomization status     | 1.00                       | 1.33 (0.94-1.89) | 1.55 (1.17-2.05) | 2.01 (1.57-2.59) | 2.87 (2.21-3.74) |                                            |
| Basic model*                              | 1.00                       | 1.33 (0.93-1.89) | 1.54 (1.17-2.04) | 2.01 (1.56-2.59) | 2.91 (2.22-3.81) |                                            |
| <b>Subtypes of VTE</b>                    |                            |                  |                  |                  |                  |                                            |
| <b>Unprovoked VTE (266 cases)</b>         | 30                         | 20               | 52               | 93               | 71               |                                            |
| Incidence rate (per 100 000 person-years) | 27                         | 39               | 49               | 60               | 84               |                                            |
| Age, energy, and randomization status     | 1.00                       | 1.44 (0.82-2.54) | 1.72 (1.10-2.69) | 2.10 (1.39-3.17) | 3.11 (2.03-4.77) | 0.98                                       |
| Basic model*                              | 1.00                       | 1.45 (0.82-2.56) | 1.73 (1.10-2.72) | 2.17 (1.44-3.28) | 3.40 (2.20-5.26) | 0.92                                       |
| <b>Provoked VTE (409 cases)</b>           | 51                         | 30               | 75               | 149              | 104              |                                            |
| Incidence rate (per 100 000 person-years) | 47                         | 59               | 70               | 96               | 123              |                                            |
| Age and randomization status              | 1.00                       | 1.27 (0.81-1.99) | 1.45 (1.01-2.06) | 1.96 (1.43-2.70) | 2.73 (1.95-3.82) |                                            |
| Basic model*                              | 1.00                       | 1.25 (0.80-1.97) | 1.43 (1.00-2.05) | 1.92 (1.39-2.64) | 2.63 (1.87-3.70) |                                            |

Values are HRs (95% CIs).

\*Adjusted for randomization status (aspirin, vitamin E, and beta-carotene), age (continuous), smoking (never, past, current), time varying postmenopausal status (premenopausal, postmenopausal, not sure), time varying hormone therapy use (never, past, current), alcohol intake (rarely/never, 1-3 drinks per month, 1-6 drinks per week, and ≥1 drink per day), cigarettes per day (continuous; approximately as 10 cigarette per day increment), energy intake (quintiles), and physical activity (quartiles), and highest education level (licensed practical nurse/licensed veterinary nurse, associate's degree, bachelor's degree, advanced degree).

<sup>€</sup>p value associated with null hypothesis that the effect of BMI is equal for each event type; likelihood ratio test with 4 df.
